# Supplementary material for: Honokiol, a Lignan Biphenol Derived from the Magnolia Tree, Inhibits Dengue Virus Type 2 Infection
Source: MDPI journal article supplement (doi:10.3390/v7092852), 2015-09-10
Supplement: s1 [file s1]

## Supplementary Information

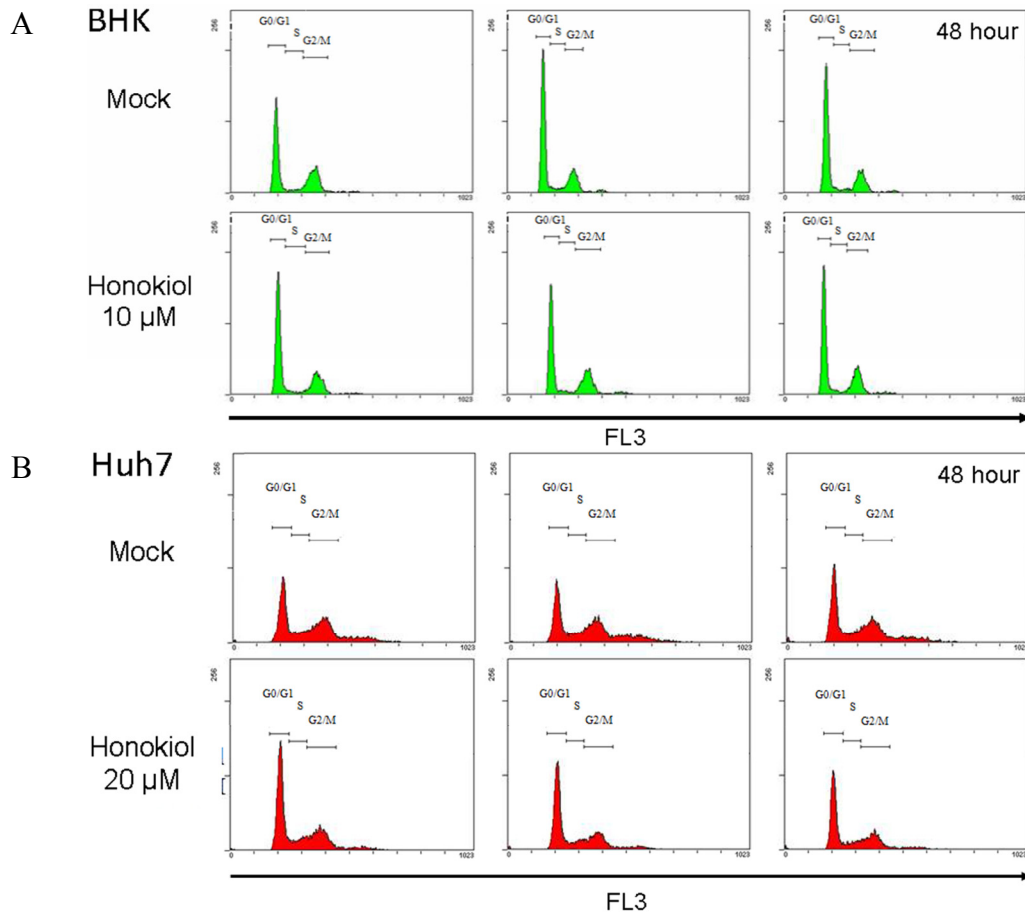

**Figure S1.** Cell cycle analysis of honokiol-treated BHK and Huh7 cells. **(A)** BHK, and **(B)** Huh7 cells were treated with honokiol for 48 h and the cell cycle distribution was analyzed by flow cytometry.

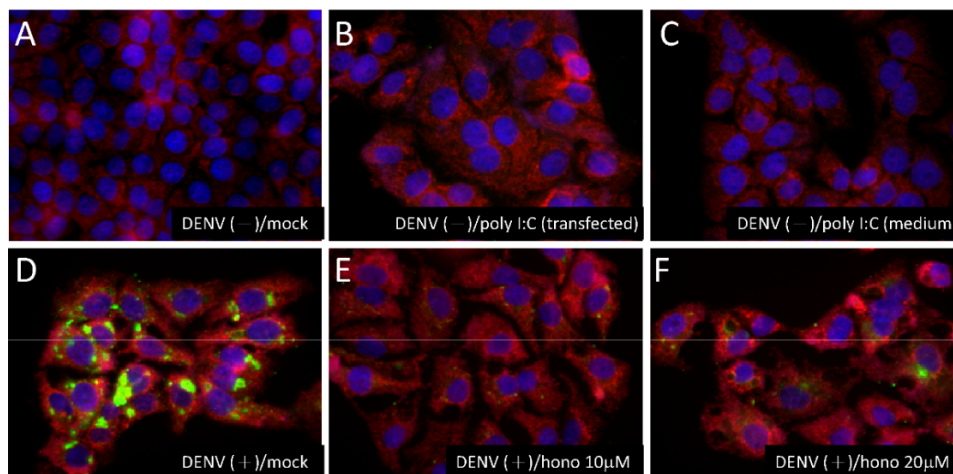

**Figure S2.** DENV infection and honokiol treatment does not induce the nuclear translocation of IRF-3. Uninfected Huh7 cells were **(A)** mock-treated, **(B)** transfected with poly I:C (1.0  $\mu$ g), or **(C)** treated with poly I:C (5  $\mu$ g/mL) in medium for 48 h. DENV-infected Huh7 cells were **(D)** mock-treated or incubated with honokiol at **(E)** 10  $\mu$ M and **(F)** 20  $\mu$ M for 48 h. Immunofluorescence staining was conducted to detect the DENV E protein (green fluorescence) and the IRF-3 (red fluorescence). Cell nuclei were stained with Hoechst 33258.
